# Supplementary material
Source: publisher figshare collection journal article supplement (https://karger.figshare.com/articles/dataset/_/4239509)
Supplement: Supplementary file 1 [file 1]

# Supplemental Fig. The typical images of each lung injury scores.
